# Supplementary material for: New insights into the proton pumping mechanism of ba3 cytochrome c oxidase: the functions of key residues and water
Source: Royal Society of Chemistry journal article supplement (doi:10.1039/d3cp01334k), 2023-01-01
Supplement: d3cp01334k1.pdf [file d3cp01334k1.pdf]

## Support information

### New insight into the proton pumping mechanism of $ba_3$

### Cytochrome c Oxidase: the functions of key residues and waters

Xiaoyue Yang <sup>a</sup>, Shaohui Liu <sup>a</sup>, Zhili Yin <sup>a</sup>, Mengguo Chen <sup>a</sup>, Jinshuai Song <sup>b</sup>, Pengfei Li <sup>c</sup> and Longhua Yang <sup>\*a</sup>

<sup>a</sup> School of Pharmaceutical Sciences & Key Laboratory of Advanced Drug Preparation Technologies, Zhengzhou University, Zhengzhou, Henan, 450001, China

<sup>b</sup> Green Catalysis Center, and College of Chemistry, Zhengzhou University, Zhengzhou, Henan 450001, China

<sup>c</sup> Department of Chemistry and Biochemistry, Loyola University Chicago, Chicago, Illinois 60660, United States

#### Contents:

1. Schematic diagram of the protein model and the relative position of some of its structures.
2. The proposed E1 proton transfer pathway.
3. RMSD of WT and Mutants.
4. Computational active site model built from crystal structure.
5. Calculation of indirect transfer of protons from Tyr237 to  $O_{Cu}$  atom.
6. Cartesian coordinates for DFT-optimized structures.
7. The NPA charge of  $I_R$  and  $I_R'$ .

## 1 Schematic diagram of the protein model and the relative position of some of its structures.

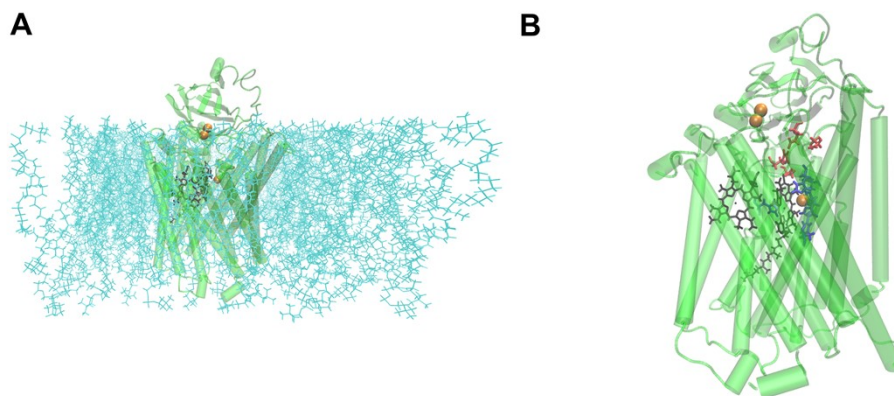

**Fig. S1** (A) The membrane added in MD simulation. The hydrophobic portion of lipids in MD simulation (in grey line representation) is retained as the low dielectric environment for MD calculations. CcO is shown as the green cartoon, Coppers are shown as orange spheres. Heme a<sub>3</sub> and heme b, are shown as black lines. (B) The residues (Asp287, Asp372, His376, Glu126<sup>II</sup>) are shown as red licorice, the residues (His233, Tyr237, His282, His283 and His384) are shown as blue licorice.

**2. The proposed E1 proton transfer pathway** (Yang, L., et al., *Biochim. Biophys. Acta - Bioenerg.*, 1857 (2016) 1594-1606.).

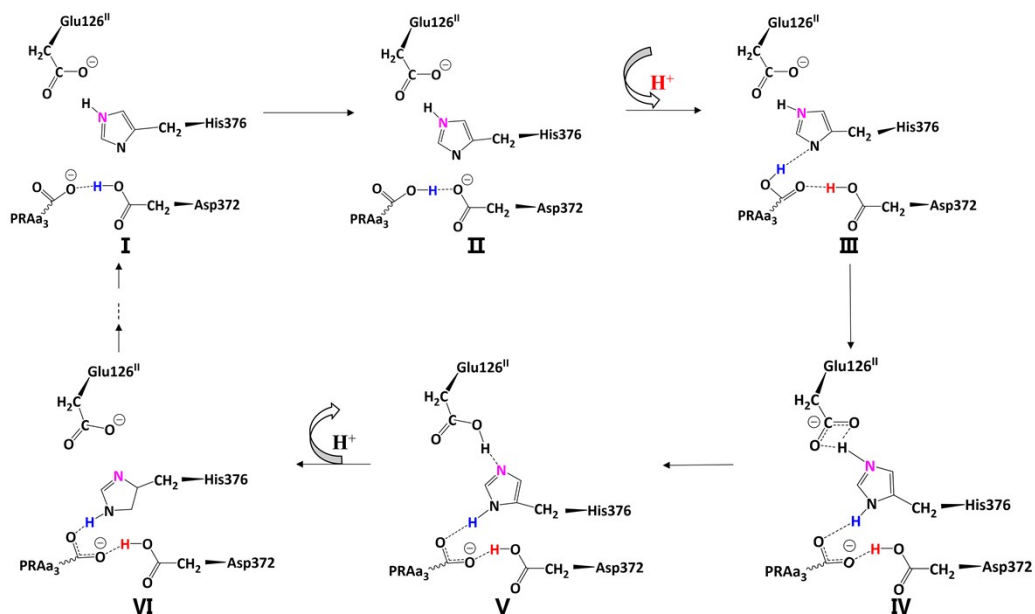

**Fig. S2** The proposed proton transfer pathway by our previous calculations. **(I)** A strong hydrogen bond exists between protonated Asp372 and PRAa<sub>3</sub>, facilitating proton transfer. **(II)** The proton is loaded on PRAa<sub>3</sub>. **(III)** Proton uptake by Asp372 results in formation of a strong hydrogen bond between protonated PRAa<sub>3</sub> and His376. **(IV)** Proton transfer from PRAa<sub>3</sub> to His376 results in a strong hydrogen bond between His376 and Glu126<sup>II</sup>. **(V)** Proton transfer from doubly protonated His376 to Glu126<sup>II</sup> and subsequent release into the water pool. **(VI)** Structure and protonation state equivalent to **(I)** with exception of the orientation of His376 and protonation site δ-nitrogen.

### 3. RMSD of WT and Mutants.

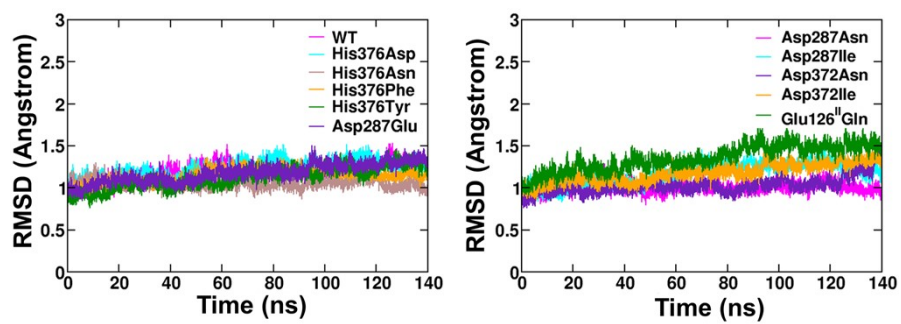

**Fig. S3** RMSD of WT and Mutants (His376Asp, His376Tyr, His376Phe, His376Asn, Asp372Asn, Asp287Asn, Asp287Ile, Asp287Glu, Asp372Ile, Glu126<sup>H</sup>Gln).

#### 4. Computational active site model built from crystal structure.

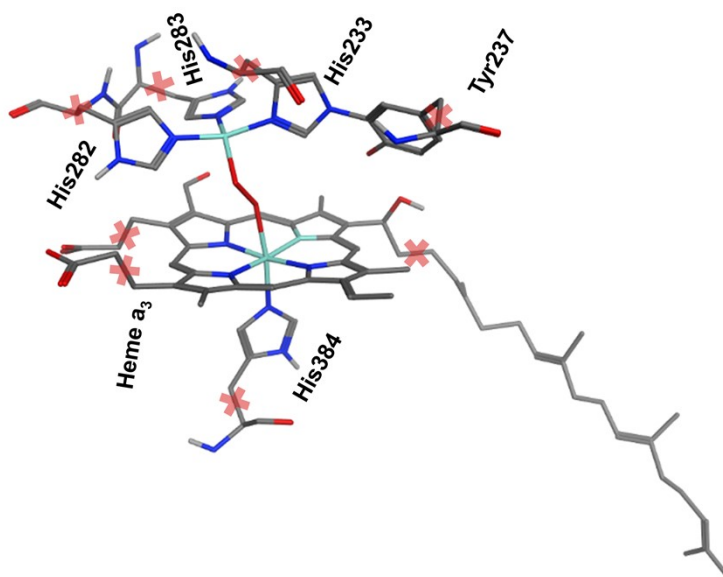

**Fig. S4.** Atomic coordinates were taken from the minimized structure of the crystal. The hydroxyethyl farnesyl chain was clipped at the 3-position, the heme propionates were replaced with methyl groups. For each residue included in the model, the C $\alpha$  atoms was substituted by a link H atom (H $_{link}$ ). All C atoms linked to H $_{link}$  will be fixed were then all frozen to mimic the structural constraints of the protein environment.

## 5. Calculation of indirect transfer of protons from Tyr237 to O<sub>Cu</sub> atom.

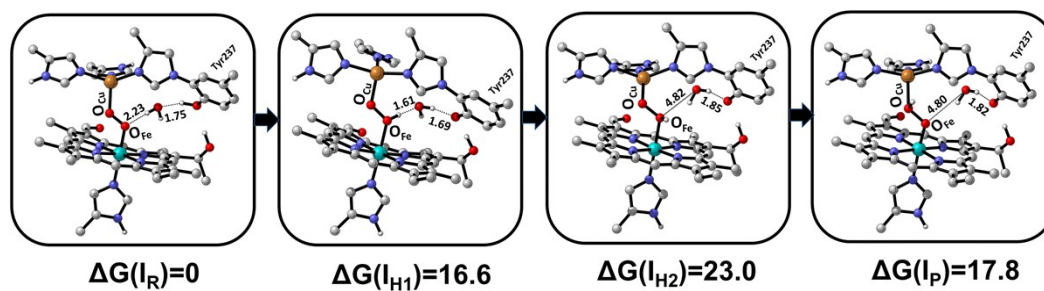

**Fig S5** The process in which H<sup>+</sup> first reaches O<sub>Fe</sub> atom from active site Tyr237 and then transfers to peroxy O<sub>Cu</sub> atom, mediated by the interstitial water molecule. Calculated ΔG values in kcal/mol, relative to I<sub>R</sub>.

## 6. Cartesian coordinates for DFT-optimized structures.

I<sub>R</sub>

|    |             |             |             |
|----|-------------|-------------|-------------|
| Fe | 0.16528300  | 1.86039800  | 0.08629200  |
| Cu | -1.79649500 | -2.16925200 | -1.00076900 |
| O  | -0.04405700 | 0.13525400  | -0.30950100 |
| O  | -1.10891000 | -0.23284900 | -0.96159900 |
| C  | -5.34503000 | 1.33527000  | 0.84210100  |
| C  | 4.24516700  | 2.90790300  | -3.60077700 |
| C  | -3.70614300 | 3.24982900  | -3.72544100 |
| N  | -1.63224800 | 1.73629600  | 1.01210200  |
| C  | 5.32194600  | 2.39460700  | -4.21369100 |
| N  | 1.09245000  | 1.23560100  | 1.79535600  |
| N  | -0.71763700 | 2.50836700  | -1.58499600 |
| C  | -3.05775400 | 2.25669500  | -0.92011800 |
| C  | -0.88661400 | 1.01413900  | 3.23523400  |
| C  | 3.38588400  | 1.07537900  | 0.96145700  |
| C  | 1.25725600  | 2.95982300  | -2.94996100 |
| C  | -3.96942200 | 0.56764600  | 3.65603200  |
| C  | 1.17617500  | 0.19476100  | 5.40844300  |
| C  | 5.68871000  | 1.56179600  | -1.02991800 |
| C  | -0.78985100 | 3.79531800  | -5.11434600 |
| O  | -3.42749900 | 0.16649500  | 4.67802700  |
| C  | -2.84794200 | 1.82220900  | 0.38969400  |
| C  | 0.48432400  | 0.97824900  | 3.00141900  |
| C  | 3.17594800  | 1.61550100  | -0.29900900 |
| C  | -0.11576000 | 2.93061300  | -2.73491200 |
| C  | -3.90839400 | 1.42036100  | 1.27073500  |
| C  | 1.47022200  | 0.50988800  | 3.97015900  |
| C  | 4.23869400  | 1.85485600  | -1.26034900 |
| C  | -1.11029800 | 3.29515200  | -3.73923500 |
| C  | -3.29902300 | 1.09562400  | 2.47288900  |
| C  | 2.67591900  | 0.45827400  | 3.30707600  |
| C  | 3.64335300  | 2.42902800  | -2.35857800 |
| C  | -2.33031400 | 3.06838500  | -3.16572100 |
| C  | -1.86748200 | 1.29538500  | 2.28273400  |
| C  | 2.41555900  | 0.93119800  | 1.95400900  |
| C  | 2.21760900  | 2.51357800  | -2.05334800 |
| C  | -2.07043800 | 2.58874700  | -1.82200700 |
| C  | 4.02489100  | 0.01691200  | 3.84447300  |
| O  | 4.74477800  | -0.78663600 | 2.91394700  |
| N  | 1.96039900  | 2.02102300  | -0.80130500 |
| H  | -5.70949200 | 2.30257400  | 0.47794600  |
| H  | 3.76109200  | 3.76798100  | -4.06234400 |
| H  | -4.28710000 | 3.97938500  | -3.14899900 |

|   |             |             |             |
|---|-------------|-------------|-------------|
| H | 5.83696900  | 1.51375400  | -3.84524900 |
| H | -4.08541800 | 2.34027400  | -1.25304400 |
| H | -1.25044700 | 0.71842400  | 4.21119900  |
| H | 4.38017800  | 0.72983900  | 1.21188800  |
| H | 1.59989600  | 3.30148200  | -3.91919000 |
| H | 1.98359200  | -0.38346100 | 5.86478100  |
| H | 6.31496000  | 2.20225000  | -1.65662900 |
| H | -0.19525200 | 3.06789400  | -5.67935000 |
| H | 3.84343500  | -0.55690300 | 4.76761600  |
| H | 4.17860700  | -1.51464200 | 2.59991000  |
| H | -5.46759000 | 0.61315700  | 0.02655600  |
| H | -3.67666100 | 3.60185800  | -4.75941500 |
| H | 5.70700100  | 2.83796000  | -5.12639500 |
| H | -5.07718000 | 0.53632100  | 3.57813000  |
| H | 1.05864500  | 1.11086500  | 5.99968200  |
| H | 5.97286200  | 1.72380700  | 0.01385400  |
| H | -1.69742500 | 3.99469300  | -5.68894300 |
| H | 0.24889500  | -0.37580800 | 5.52223400  |
| H | 5.93794500  | 0.52080400  | -1.27191300 |
| H | -0.21225400 | 4.72648900  | -5.07997600 |
| H | -4.27607700 | 2.31202700  | -3.71986500 |
| H | -6.00199700 | 1.02949300  | 1.65891600  |
| C | 4.95110500  | 1.18582500  | 4.19904000  |
| H | 5.90877400  | 0.79336700  | 4.55113400  |
| H | 5.13503000  | 1.81390300  | 3.32279500  |
| H | 4.51274200  | 1.80658200  | 4.98606000  |
| C | -1.01557400 | -5.41665400 | -2.39373300 |
| C | 0.03661400  | -4.61599100 | -1.71109200 |
| C | 1.29231100  | -4.99937900 | -1.33104400 |
| N | -0.10820000 | -3.25955900 | -1.46121500 |
| C | 1.05216800  | -2.83625500 | -0.98827600 |
| N | 1.93206600  | -3.86026000 | -0.86025800 |
| H | 1.30104600  | -1.81335200 | -0.75276900 |
| H | -0.68549100 | -6.44829000 | -2.53873100 |
| H | 1.79873200  | -5.95064600 | -1.36779900 |
| C | 6.20762200  | -4.64533500 | -3.01032100 |
| C | 5.48371000  | -4.14431700 | -1.79733700 |
| C | 6.11718100  | -3.67384300 | -0.63690100 |
| C | 4.09855800  | -4.16145500 | -1.80877000 |
| C | 5.37871200  | -3.24712900 | 0.46322200  |
| C | 3.34724200  | -3.75649100 | -0.70835700 |
| C | 3.97588800  | -3.28560500 | 0.45334900  |
| O | 3.32490200  | -2.88796000 | 1.58067100  |
| H | 7.17732700  | -4.15434300 | -3.14123100 |



|   |             |             |             |
|---|-------------|-------------|-------------|
| H | 7.20220000  | -3.63366200 | -0.59245400 |
| H | 3.56785800  | -4.49318300 | -2.69606200 |
| H | 5.87178800  | -2.87143800 | 1.35404900  |
| H | 6.40451800  | -5.72277900 | -2.94216800 |
| H | -1.95042600 | -5.43839100 | -1.82213500 |
| H | 2.35910200  | -2.71357300 | 1.47478400  |
| C | -0.84152700 | 7.27384400  | 1.36791000  |
| C | -0.20488100 | 5.93200400  | 1.21270500  |
| C | -0.66408500 | 4.75840600  | 0.67588200  |
| N | 1.08649200  | 5.64325800  | 1.63176300  |
| C | 1.35672600  | 4.34632900  | 1.34332700  |
| N | 0.31230500  | 3.78387700  | 0.76133300  |
| H | 2.29433200  | 3.85948500  | 1.56023700  |
| H | -1.85220400 | 7.25062000  | 0.95529700  |
| H | -1.62607200 | 4.55180600  | 0.23601900  |
| H | -0.91762200 | 7.57127900  | 2.42015600  |
| H | 1.72375600  | 6.28763200  | 2.07627900  |
| C | -5.17938700 | -3.40538500 | 3.45214000  |
| C | -4.02210200 | -3.28391100 | 2.52039200  |
| C | -3.86526000 | -2.63398200 | 1.32445500  |
| N | -2.79246200 | -3.87373900 | 2.75728100  |
| C | -1.95939400 | -3.56953400 | 1.72943700  |
| N | -2.58326400 | -2.82021300 | 0.83690800  |
| H | -0.92354700 | -3.86710200 | 1.68869800  |
| H | -5.42113300 | -4.45197400 | 3.66917200  |
| H | -4.59432500 | -2.05379900 | 0.78172200  |
| H | -4.98582200 | -2.89819800 | 4.40463100  |
| C | -7.21688900 | -2.39280100 | -1.94198600 |
| C | -5.78684400 | -2.06286500 | -2.18586000 |
| C | -4.64138900 | -2.71536200 | -1.81958600 |
| N | -5.34466400 | -0.90086400 | -2.80131700 |
| C | -3.98299000 | -0.89200600 | -2.77006900 |
| N | -3.52794700 | -1.97550200 | -2.16847800 |
| H | -3.37837400 | -0.08850200 | -3.16310200 |
| H | -7.79485200 | -2.46474500 | -2.87086900 |
| H | -4.55076600 | -3.65645800 | -1.29961300 |
| H | -7.28883400 | -3.35764800 | -1.43553400 |
| H | -5.92950400 | -0.20285500 | -3.23726100 |
| H | -2.54563800 | -4.41970800 | 3.56995100  |
| H | 0.47500300  | -1.34163400 | 1.27500300  |
| O | 0.80537500  | -2.01649300 | 1.89143600  |
| H | 0.99532900  | -1.51209800 | 2.69897200  |
| H | -0.28304400 | 8.05454900  | 0.83876400  |
| H | 5.62380500  | -4.47862200 | -3.91980400 |

|   |             |             |             |
|---|-------------|-------------|-------------|
| H | -1.24493800 | -4.98959900 | -3.37593000 |
| H | -7.70601300 | -1.64445900 | -1.30706900 |
| H | -6.06490300 | -2.94662500 | 3.00663800  |

**TS1**

|    |             |             |             |
|----|-------------|-------------|-------------|
| Fe | 0.35563300  | 1.88986800  | 0.07059000  |
| Cu | -1.94388000 | -2.11106200 | -0.86444300 |
| O  | -0.09768300 | 0.04481100  | -0.16515800 |
| O  | -1.25532500 | -0.26188100 | -0.81876000 |
| C  | -5.22358500 | 1.75503700  | 0.62187100  |
| C  | 4.53954500  | 1.92803700  | -3.63213700 |
| C  | -3.28645400 | 3.26085900  | -3.98181900 |
| N  | -1.50334100 | 1.92360400  | 0.95252400  |
| C  | 5.48030200  | 1.12959700  | -4.15544000 |
| N  | 1.15371400  | 1.28956000  | 1.85662700  |
| N  | -0.43125700 | 2.44205700  | -1.67674500 |
| C  | -2.79737400 | 2.49323900  | -1.05714300 |
| C  | -0.90586400 | 1.10826100  | 3.18494200  |
| C  | 3.44456600  | 0.89014800  | 1.11667900  |
| C  | 1.59122200  | 2.50079300  | -3.03976000 |
| C  | -4.00719100 | 0.60279800  | 3.35645700  |
| C  | 0.99702600  | 0.23445400  | 5.46502700  |
| C  | 5.77623400  | 0.77119800  | -0.86525000 |
| C  | -0.30846300 | 3.32842200  | -5.32283600 |
| O  | -3.52538200 | 0.02209000  | 4.32305700  |
| C  | -2.67755700 | 2.08229700  | 0.27948000  |
| C  | 0.47476600  | 1.06081500  | 3.03383900  |
| C  | 3.30463800  | 1.28802300  | -0.20175800 |
| C  | 0.22141900  | 2.66816800  | -2.84895600 |
| C  | -3.80129700 | 1.71136800  | 1.09297100  |
| C  | 1.38722000  | 0.55656100  | 4.05397300  |
| C  | 4.39148400  | 1.24980700  | -1.16497800 |
| C  | -0.70916400 | 3.03489100  | -3.91098700 |
| C  | -3.26560300 | 1.26744400  | 2.29304100  |
| C  | 2.61850300  | 0.45062400  | 3.45488600  |
| C  | 3.87965400  | 1.73570900  | -2.34240700 |
| C  | -1.95329000 | 3.01538900  | -3.34963200 |
| C  | -1.82355300 | 1.43131200  | 2.18552500  |
| C  | 2.44341900  | 0.91100900  | 2.08743400  |
| C  | 2.47850000  | 2.04954700  | -2.08061800 |
| C  | -1.76922100 | 2.65196700  | -1.95459900 |
| C  | 3.91263100  | -0.07730300 | 4.03475400  |
| O  | 4.57416500  | -0.96706700 | 3.14171400  |
| N  | 2.14694800  | 1.76192200  | -0.77547400 |

|   |             |             |             |
|---|-------------|-------------|-------------|
| H | -5.47430800 | 2.74224500  | 0.21845100  |
| H | 4.22487400  | 2.79916800  | -4.20637900 |
| H | -3.85392700 | 4.03138900  | -3.44745600 |
| H | 5.80709900  | 0.22206500  | -3.65804800 |
| H | -3.80296700 | 2.65871900  | -1.42724300 |
| H | -1.32762200 | 0.78948900  | 4.12987700  |
| H | 4.39844200  | 0.48635800  | 1.42501900  |
| H | 1.97825600  | 2.67804800  | -4.03600000 |
| H | 1.78694300  | -0.31676400 | 5.97998000  |
| H | 6.48575400  | 1.14977700  | -1.60460500 |
| H | 0.16186100  | 2.45668100  | -5.79296700 |
| H | 3.66702800  | -0.60804200 | 4.96922900  |
| H | 3.91546700  | -1.46324200 | 2.60650000  |
| H | -5.39404800 | 1.01963300  | -0.17353700 |
| H | -3.18482800 | 3.58852100  | -5.01867100 |
| H | 5.93656400  | 1.35521700  | -5.11392700 |
| H | -5.10949500 | 0.61600500  | 3.22252200  |
| H | 0.80272900  | 1.14711100  | 6.04040700  |
| H | 6.10788400  | 1.09576000  | 0.12593200  |
| H | -1.16837900 | 3.60943900  | -5.93475700 |
| H | 0.08358500  | -0.36862000 | 5.50718300  |
| H | 5.82599900  | -0.32525000 | -0.87614400 |
| H | 0.41478000  | 4.15069500  | -5.36998800 |
| H | -3.90221100 | 2.35166800  | -3.99152400 |
| H | -5.93066300 | 1.54390100  | 1.42646900  |
| C | 4.90932900  | 1.04030300  | 4.37897000  |
| H | 5.83792900  | 0.59516700  | 4.74578000  |
| H | 5.13727300  | 1.63491800  | 3.48919200  |
| H | 4.50210300  | 1.70215700  | 5.14929400  |
| C | -1.31791100 | -5.48565600 | -2.04690500 |
| C | -0.24825100 | -4.59253400 | -1.52837100 |
| C | 1.01531300  | -4.92182700 | -1.12925700 |
| N | -0.37051700 | -3.20895000 | -1.50135500 |
| C | 0.80833300  | -2.72673700 | -1.13813700 |
| N | 1.67553900  | -3.72757200 | -0.87356500 |
| H | 1.07458300  | -1.68502100 | -1.07178100 |
| H | -1.02946200 | -6.53522200 | -1.95304600 |
| H | 1.51020300  | -5.87254700 | -1.01556800 |
| C | 5.96012400  | -5.29544500 | -2.42637100 |
| C | 5.22917600  | -4.40088000 | -1.47198200 |
| C | 5.83164100  | -3.62177400 | -0.46190400 |
| C | 3.84766400  | -4.36174900 | -1.56371000 |
| C | 5.07358600  | -2.85710700 | 0.41467800  |
| C | 3.07382800  | -3.62167900 | -0.68265400 |

|   |             |             |             |
|---|-------------|-------------|-------------|
| C | 3.64451300  | -2.82960800 | 0.36081600  |
| O | 2.94164100  | -2.14183600 | 1.21639900  |
| H | 6.99614600  | -4.97611600 | -2.58058000 |
| H | 6.91461900  | -3.62051600 | -0.36467600 |
| H | 3.34671600  | -4.91993500 | -2.34926000 |
| H | 5.55122400  | -2.26916600 | 1.19232500  |
| H | 5.99865800  | -6.32706200 | -2.05233800 |
| H | -2.26010200 | -5.33773000 | -1.50563400 |
| H | 1.48337100  | -1.91901100 | 1.33332500  |
| C | -0.29718600 | 7.36122600  | 0.97721000  |
| C | 0.23789300  | 5.96655800  | 0.91950500  |
| C | -0.29223800 | 4.80202300  | 0.42924900  |
| N | 1.48964000  | 5.60737300  | 1.40425900  |
| C | 1.67353100  | 4.27916500  | 1.19989200  |
| N | 0.60802800  | 3.76878900  | 0.60777600  |
| H | 2.55678900  | 3.72631400  | 1.47716600  |
| H | -1.29576600 | 7.38905600  | 0.53632900  |
| H | -1.24902800 | 4.63276600  | -0.03578100 |
| H | -0.37491000 | 7.72369600  | 2.00852300  |
| H | 2.15572600  | 6.22906700  | 1.83835100  |
| C | -5.51280200 | -2.81760800 | 3.50664600  |
| C | -4.35440700 | -2.93022100 | 2.57234800  |
| C | -4.16431300 | -2.50780700 | 1.28223400  |
| N | -3.14649400 | -3.50432300 | 2.93331900  |
| C | -2.28527200 | -3.40191000 | 1.88619200  |
| N | -2.87838300 | -2.80946300 | 0.86345900  |
| H | -1.25543700 | -3.72391900 | 1.90637600  |
| H | -5.78086500 | -3.78492200 | 3.94503800  |
| H | -4.86110400 | -2.00830200 | 0.62835700  |
| H | -5.28169600 | -2.11875000 | 4.31962000  |
| C | -7.28007600 | -1.98482900 | -2.01213400 |
| C | -5.83712900 | -1.67211100 | -2.15795400 |
| C | -4.73072100 | -2.44051500 | -1.92467500 |
| N | -5.33460300 | -0.42254600 | -2.49684000 |
| C | -3.97349700 | -0.48012900 | -2.44252900 |
| N | -3.58473900 | -1.68988400 | -2.08730400 |
| H | -3.31681500 | 0.35730600  | -2.62013200 |
| H | -7.83992000 | -1.82600000 | -2.94133000 |
| H | -4.68531000 | -3.47152700 | -1.60871000 |
| H | -7.40024000 | -3.03287700 | -1.72956300 |
| H | -5.88264800 | 0.37740500  | -2.77735400 |
| H | -2.92691300 | -3.88746000 | 3.84116500  |
| H | 0.12326300  | -0.71664400 | 0.62814900  |
| O | 0.48707700  | -1.64955000 | 1.49853000  |

|                        |             |             |             |
|------------------------|-------------|-------------|-------------|
| H                      | 0.46436500  | -1.23860400 | 2.37566200  |
| H                      | 0.33573700  | 8.06173500  | 0.42070700  |
| H                      | 5.46931600  | -5.32329100 | -3.40391700 |
| H                      | -1.51260000 | -5.27410600 | -3.10399200 |
| H                      | -7.75157700 | -1.37197900 | -1.23429200 |
| H                      | -6.38591700 | -2.43884100 | 2.97049500  |
| <b>I<sub>III</sub></b> |             |             |             |
| Fe                     | 0.14092000  | 1.83545800  | -0.20828700 |
| Cu                     | -1.82878700 | -2.62879600 | -0.67515900 |
| O                      | -0.28056800 | -0.13844000 | -0.00212900 |
| O                      | -1.50407300 | -0.64531800 | -0.41783000 |
| C                      | -5.31017000 | 2.06221200  | 0.97969000  |
| C                      | 4.06720400  | 1.45079700  | -4.15590700 |
| C                      | -3.86841100 | 1.98643900  | -4.21093000 |
| N                      | -1.59810900 | 2.08455300  | 0.80150700  |
| C                      | 5.08085300  | 0.70863300  | -4.62418700 |
| N                      | 1.09638800  | 1.67452900  | 1.58755300  |
| N                      | -0.82180600 | 1.91302400  | -1.96230200 |
| C                      | -3.11016600 | 1.95208700  | -1.13185100 |
| C                      | -0.77010200 | 2.14746400  | 3.10365500  |
| C                      | 3.30961300  | 1.05819000  | 0.76992900  |
| C                      | 1.10249900  | 1.80549300  | -3.45839500 |
| C                      | -3.80482100 | 2.27844900  | 3.79487100  |
| C                      | 1.28506600  | 1.66804300  | 5.34931600  |
| C                      | 5.56235500  | 0.87413900  | -1.33158600 |
| C                      | -1.02725900 | 1.92536800  | -5.71287300 |
| O                      | -3.21058100 | 2.32728000  | 4.86354800  |
| C                      | -2.83961800 | 2.01156000  | 0.24912800  |
| C                      | 0.55601900  | 1.85164000  | 2.83836600  |
| C                      | 3.07975000  | 1.23962400  | -0.59119300 |
| C                      | -0.26887200 | 1.89880600  | -3.20441300 |
| C                      | -3.85344500 | 2.06557300  | 1.27167500  |
| C                      | 1.52507300  | 1.54727800  | 3.87324500  |
| C                      | 4.11536900  | 1.14030000  | -1.60750900 |
| C                      | -1.29302600 | 1.92447800  | -4.23812700 |
| C                      | -3.19009900 | 2.19540200  | 2.47352600  |
| C                      | 2.66306300  | 1.15644700  | 3.21734900  |
| C                      | 3.49935500  | 1.38982000  | -2.81036200 |
| C                      | -2.49799800 | 1.93976500  | -3.58903400 |
| C                      | -1.77877400 | 2.18391300  | 2.14907000  |
| C                      | 2.38469900  | 1.27867900  | 1.79438900  |
| C                      | 2.09063900  | 1.62381100  | -2.50549900 |
| C                      | -2.18766100 | 1.94238300  | -2.16060400 |

|   |             |             |             |
|---|-------------|-------------|-------------|
| C | 3.97383300  | 0.76778800  | 3.83383400  |
| O | 4.65023600  | -0.24954700 | 3.11617000  |
| N | 1.86138600  | 1.53883200  | -1.15200500 |
| H | -5.42471900 | 2.75985100  | 0.15719600  |
| H | 3.61170200  | 2.17412300  | -4.83193400 |
| H | -4.64038000 | 1.61718700  | -3.52721500 |
| H | 5.55869600  | -0.06283300 | -4.02946200 |
| H | -4.15715800 | 1.94404200  | -1.41501800 |
| H | -1.08792000 | 2.25179000  | 4.13357500  |
| H | 4.29622700  | 0.74087000  | 1.08048600  |
| H | 1.41145400  | 1.80565300  | -4.49750600 |
| H | 2.04362600  | 1.12796000  | 5.92104000  |
| H | 6.18295700  | 1.22142500  | -2.16131400 |
| H | -0.40607200 | 1.07386100  | -6.01362100 |
| H | 3.78113700  | 0.42833600  | 4.86503600  |
| H | 4.00888300  | -0.89988900 | 2.74404900  |
| H | -5.67409600 | 1.07995200  | 0.65670100  |
| H | -4.15758900 | 3.01054200  | -4.47764800 |
| H | 5.44860600  | 0.84278800  | -5.63642500 |
| H | -4.91501900 | 2.29043900  | 3.78515500  |
| H | 1.31757600  | 2.71492400  | 5.67445600  |
| H | 5.89618300  | 1.38187700  | -0.42132400 |
| H | -1.95654100 | 1.87342200  | -6.28499100 |
| H | 0.30524300  | 1.27573800  | 5.63887300  |
| H | 5.76118800  | -0.19534500 | -1.18986400 |
| H | -0.50196900 | 2.83513800  | -6.02799100 |
| H | -3.93198800 | 1.38590500  | -5.13046600 |
| H | -5.92167800 | 2.39927800  | 1.81752400  |
| C | 4.92922000  | 1.95706600  | 3.89854200  |
| H | 5.90064900  | 1.52814900  | 4.10811300  |
| H | 4.98177900  | 2.47812500  | 2.93816300  |
| H | 4.65192400  | 2.67117900  | 4.67815800  |
| C | -0.72300100 | -5.82063400 | -1.04413100 |
| C | 0.29800700  | -4.79556800 | -0.69466300 |
| C | 1.63314600  | -4.96760500 | -0.45676800 |
| N | 0.02776000  | -3.43500500 | -0.73933000 |
| C | 1.18015200  | -2.80961900 | -0.53980400 |
| N | 2.18572600  | -3.70181300 | -0.35372700 |
| H | 1.32889400  | -1.74249100 | -0.54642800 |
| H | -0.43014600 | -6.81364500 | -0.69502100 |
| H | 2.23363700  | -5.85523900 | -0.33963400 |
| C | 6.79538500  | -4.62737600 | -1.77562600 |
| C | 5.85296100  | -3.92228100 | -0.84222400 |
| C | 6.29967200  | -3.08025400 | 0.20020700  |

|   |             |             |             |
|---|-------------|-------------|-------------|
| C | 4.47634100  | -4.08425200 | -0.99837900 |
| C | 5.41465500  | -2.42008700 | 1.02908800  |
| C | 3.56766900  | -3.43626100 | -0.16946100 |
| C | 3.99299400  | -2.55496300 | 0.87980800  |
| O | 3.16013500  | -1.92343800 | 1.63785400  |
| H | 7.55485100  | -3.95041400 | -2.18202300 |
| H | 7.36818700  | -2.94333600 | 0.34912500  |
| H | 4.09511900  | -4.71866600 | -1.79406900 |
| H | 5.77699300  | -1.76987100 | 1.81755700  |
| H | 7.32853400  | -5.44849200 | -1.27997200 |
| H | -1.70565700 | -5.57725300 | -0.62982900 |
| H | -0.04589600 | -0.58300700 | 0.88422600  |
| C | -0.45894900 | 7.40901300  | -0.61849000 |
| C | 0.07264600  | 6.03232800  | -0.38662900 |
| C | -0.48355900 | 4.79085600  | -0.55843600 |
| N | 1.34166600  | 5.78036100  | 0.11270000  |
| C | 1.50800500  | 4.43959800  | 0.22426300  |
| N | 0.41574300  | 3.81181800  | -0.17743400 |
| H | 2.40716000  | 3.96873600  | 0.58742000  |
| H | -1.46929300 | 7.34835400  | -1.02856400 |
| H | -1.46491800 | 4.53863600  | -0.92603400 |
| H | -0.51354800 | 7.98403200  | 0.31318700  |
| H | 2.03130800  | 6.47582800  | 0.35677000  |
| C | -5.39244100 | -2.98499500 | 3.94220600  |
| C | -4.26113300 | -3.05055100 | 2.97104600  |
| C | -4.18456300 | -3.14709600 | 1.60485400  |
| N | -2.94603800 | -3.03826600 | 3.38414400  |
| C | -2.13861200 | -3.13106800 | 2.29882400  |
| N | -2.86192700 | -3.19856900 | 1.19393300  |
| H | -1.06099400 | -3.07259400 | 2.35177100  |
| H | -5.65868600 | -3.97225100 | 4.33757400  |
| H | -4.99670500 | -3.16872300 | 0.89654800  |
| H | -5.14817200 | -2.34008500 | 4.79288100  |
| C | -7.26696000 | -2.69551100 | -1.71768600 |
| C | -5.80721900 | -2.45867000 | -1.93034000 |
| C | -4.70108300 | -3.20006600 | -1.60439100 |
| N | -5.29247900 | -1.26012300 | -2.40267200 |
| C | -3.93668700 | -1.31140800 | -2.33129000 |
| N | -3.54640700 | -2.47186400 | -1.83379800 |
| H | -3.28224800 | -0.50317900 | -2.61617500 |
| H | -7.87611600 | -2.31505800 | -2.54402700 |
| H | -4.66344000 | -4.20027800 | -1.20032300 |
| H | -7.46552200 | -3.76555100 | -1.62430300 |
| H | -5.83337600 | -0.49411700 | -2.77589500 |

|   |             |             |             |
|---|-------------|-------------|-------------|
| H | -2.63196400 | -2.97199300 | 4.34154600  |
| H | 1.50099600  | -1.71385500 | 1.88669000  |
| O | 0.58316800  | -1.40488000 | 2.12278200  |
| H | 0.72105300  | -0.78634800 | 2.85518200  |
| H | 0.15279900  | 7.98116800  | -1.32699000 |
| H | 6.22326600  | -5.04526900 | -2.60679100 |
| H | -0.79486000 | -5.84842000 | -2.13539700 |
| H | -6.27473200 | -2.56542600 | 3.46226200  |
| H | -7.60787300 | -2.21113800 | -0.78964600 |

**TS2**

|    |             |             |             |
|----|-------------|-------------|-------------|
| Fe | 0.28665900  | 1.82621900  | 0.32992000  |
| Cu | -1.86342400 | -1.72567300 | -1.07239000 |
| O  | 0.22094200  | 0.38076400  | -1.12577000 |
| O  | -1.09401700 | -0.02306900 | -1.61888900 |
| C  | -5.28259600 | 1.69037700  | 0.91581300  |
| C  | 4.59565800  | 3.55389800  | -2.84089500 |
| C  | -3.33013000 | 4.04886100  | -3.27868900 |
| N  | -1.53677900 | 1.40366900  | 1.04667900  |
| C  | 5.65139100  | 3.12616500  | -3.54826800 |
| N  | 1.08960200  | 0.63033200  | 1.75694200  |
| N  | -0.48055300 | 2.92613300  | -1.15143200 |
| C  | -2.84614500 | 2.54166700  | -0.68425100 |
| C  | -0.95072900 | 0.05104100  | 2.99639700  |
| C  | 3.44081200  | 0.68121600  | 1.06746900  |
| C  | 1.57087100  | 3.61671200  | -2.27994600 |
| C  | -4.08333900 | -0.12747700 | 3.28478400  |
| C  | 0.96519800  | -1.40900700 | 4.93837800  |
| C  | 5.86186100  | 1.49724700  | -0.67639500 |
| C  | -0.34610000 | 4.93832800  | -4.33195700 |
| O  | -3.61318300 | -0.87087300 | 4.13748600  |
| C  | -2.73236300 | 1.82236300  | 0.47967600  |
| C  | 0.41392700  | 0.04308500  | 2.82607300  |
| C  | 3.33036300  | 1.53634000  | -0.00618000 |
| C  | 0.20152800  | 3.58325000  | -2.15214800 |
| C  | -3.86075500 | 1.36433400  | 1.25626000  |
| C  | 1.35575000  | -0.63330700 | 3.71584700  |
| C  | 4.44559600  | 1.94488400  | -0.85019500 |
| C  | -0.74055200 | 4.15638300  | -3.11969000 |
| C  | -3.32792900 | 0.62434900  | 2.29102300  |
| C  | 2.59373300  | -0.46969100 | 3.16238300  |
| C  | 3.92340300  | 2.81825100  | -1.77358200 |
| C  | -1.98286000 | 3.79206700  | -2.69064400 |
| C  | -1.87138000 | 0.67680100  | 2.13286900  |



|   |             |             |             |
|---|-------------|-------------|-------------|
| C | 2.39514600  | 0.31033300  | 1.93913700  |
| C | 2.49021100  | 2.90721800  | -1.47959300 |
| C | -1.78434500 | 3.03364800  | -1.46372000 |
| C | 3.92560800  | -0.97596800 | 3.67907300  |
| O | 4.70626000  | -1.55811000 | 2.64970300  |
| N | 2.15600800  | 2.14361500  | -0.41777700 |
| H | -5.43390900 | 2.77419000  | 0.87178500  |
| H | 4.19058100  | 4.53926800  | -3.07025400 |
| H | -3.97969900 | 4.59623700  | -2.58498200 |
| H | 6.08037300  | 2.13976200  | -3.40602100 |
| H | -3.84859200 | 2.76672800  | -1.02918700 |
| H | -1.37461600 | -0.48131100 | 3.83848200  |
| H | 4.40463700  | 0.23800900  | 1.28476500  |
| H | 1.97493400  | 4.16212200  | -3.12510800 |
| H | 1.81738400  | -1.55888500 | 5.60385900  |
| H | 6.55304200  | 2.23306400  | -1.09598500 |
| H | 0.25528900  | 4.33029800  | -5.01783400 |
| H | 3.71361400  | -1.72355200 | 4.46040000  |
| H | 4.09758600  | -2.10939100 | 2.10006100  |
| H | -5.55034900 | 1.28087900  | -0.06622700 |
| H | -3.26521300 | 4.63744900  | -4.19679700 |
| H | 6.10419400  | 3.75133900  | -4.31097600 |
| H | -5.18447500 | -0.00374700 | 3.21372200  |
| H | 0.18231300  | -0.90067800 | 5.50880400  |
| H | 6.11209000  | 1.35169100  | 0.37845000  |
| H | -1.22023700 | 5.29271300  | -4.88273700 |
| H | 0.58988100  | -2.39896600 | 4.65260500  |
| H | 6.04596200  | 0.54248700  | -1.18484500 |
| H | 0.25558100  | 5.81418100  | -4.06340600 |
| H | -3.84215600 | 3.11156000  | -3.53288400 |
| H | -5.98637200 | 1.28785500  | 1.64644200  |
| C | 4.78069600  | 0.12975500  | 4.29745500  |
| H | 5.74060900  | -0.29135800 | 4.60777200  |
| H | 4.97277800  | 0.92058400  | 3.56557900  |
| H | 4.28808500  | 0.57294900  | 5.16861200  |
| C | -1.30955000 | -4.88906700 | -3.05073900 |
| C | -0.24375100 | -4.30030800 | -2.19250700 |
| C | 1.02517600  | -4.78037600 | -2.06061700 |
| N | -0.35152500 | -3.13196100 | -1.43420800 |
| C | 0.82485200  | -2.94075600 | -0.86695400 |
| N | 1.70944600  | -3.90971300 | -1.22931500 |
| H | 1.09859200  | -2.16141500 | -0.17581300 |
| H | -0.94069900 | -5.78905300 | -3.54689400 |
| H | 1.48888900  | -5.66076800 | -2.47292200 |

|   |             |             |             |
|---|-------------|-------------|-------------|
| C | 5.93612000  | -4.73170500 | -3.48235500 |
| C | 5.23044500  | -4.21005800 | -2.27324800 |
| C | 5.89578300  | -3.66868700 | -1.15023700 |
| C | 3.84171100  | -4.26790800 | -2.25141800 |
| C | 5.19223400  | -3.19972100 | -0.05832100 |
| C | 3.11684600  | -3.83332400 | -1.15462900 |
| C | 3.75869600  | -3.25339000 | -0.00685200 |
| O | 3.07562700  | -2.79678500 | 0.98452400  |
| H | 5.33330700  | -4.60539500 | -4.38647100 |
| H | 6.98102000  | -3.60897000 | -1.15476900 |
| H | 3.31915400  | -4.63185800 | -3.12906900 |
| H | 5.70752700  | -2.76507200 | 0.79146300  |
| H | 6.89734400  | -4.23290300 | -3.64318800 |
| H | -2.19923800 | -5.15661600 | -2.46854800 |
| H | 0.62699000  | -0.44302600 | -0.82019600 |
| C | -0.35788500 | 7.06135800  | 2.37267500  |
| C | 0.11477700  | 5.65382800  | 2.12178300  |
| C | -0.41134100 | 4.61141000  | 1.39749600  |
| N | 1.31023000  | 5.15260400  | 2.62300000  |
| C | 1.46403900  | 3.87127500  | 2.19467100  |
| N | 0.43624500  | 3.51504000  | 1.44555000  |
| H | 2.31419200  | 3.24724400  | 2.42206200  |
| H | -1.31664900 | 7.21905800  | 1.87448500  |
| H | -1.33042300 | 4.57682100  | 0.83588900  |
| H | -0.49580500 | 7.25820100  | 3.44163200  |
| H | 1.96062200  | 5.65388200  | 3.20968500  |
| C | -5.57409500 | -3.39481700 | 2.85598900  |
| C | -4.37922300 | -3.25511100 | 1.97982800  |
| C | -4.11364100 | -2.43882000 | 0.91392700  |
| N | -3.20190200 | -3.95263100 | 2.18872400  |
| C | -2.27819700 | -3.54561300 | 1.28352700  |
| N | -2.80904700 | -2.62697600 | 0.48897200  |
| H | -1.24828200 | -3.87774000 | 1.27189900  |
| H | -5.86280300 | -4.44220900 | 2.99500000  |
| H | -4.76433400 | -1.72812800 | 0.43217600  |
| H | -5.37807600 | -2.95432200 | 3.84084700  |
| C | -7.29105900 | -1.53576600 | -2.40016400 |
| C | -5.82697800 | -1.26511700 | -2.43940600 |
| C | -4.75636000 | -2.06561300 | -2.14613100 |
| N | -5.26738200 | -0.02814400 | -2.74152900 |
| C | -3.91392500 | -0.12545200 | -2.61610900 |
| N | -3.58049600 | -1.34796000 | -2.24303900 |
| H | -3.21248200 | 0.68225500  | -2.75848600 |
| H | -7.77330900 | -1.36085200 | -3.36894300 |

|   |             |             |             |
|---|-------------|-------------|-------------|
| H | -4.75833300 | -3.09879800 | -1.83539700 |
| H | -7.46196300 | -2.57962000 | -2.12858300 |
| H | -5.77397700 | 0.78582900  | -3.05743300 |
| H | -3.02789300 | -4.60556000 | 2.93906700  |
| H | 1.52736600  | -3.34756200 | 1.79212800  |
| O | 0.61830300  | -3.37212700 | 2.15480800  |
| H | 0.41964000  | -2.43983200 | 2.30947300  |
| H | 0.35226900  | 7.79780300  | 1.98059200  |
| H | 6.15031900  | -5.80479900 | -3.38331000 |
| H | -1.62814100 | -4.17470900 | -3.81824400 |
| H | -6.42408700 | -2.86905100 | 2.41450800  |
| H | -7.79950800 | -0.90823500 | -1.65836100 |

### I<sub>H2</sub>

|    |             |             |             |
|----|-------------|-------------|-------------|
| Fe | 0.24028500  | 1.85416200  | 0.31066900  |
| Cu | -1.84536200 | -1.88489200 | -1.13081500 |
| O  | 0.11102900  | 0.15935500  | -0.92692000 |
| O  | -1.09552200 | -0.14157700 | -1.63079800 |
| C  | -5.32206000 | 1.53220900  | 0.95009700  |
| C  | 4.44278800  | 3.54042700  | -3.04192500 |
| C  | -3.52030100 | 3.92403300  | -3.28695500 |
| N  | -1.56859500 | 1.47331200  | 1.09318600  |
| C  | 5.54684800  | 3.16832400  | -3.70637800 |
| N  | 1.08966200  | 0.80942400  | 1.79421000  |
| N  | -0.58309700 | 2.83186500  | -1.25070900 |
| C  | -2.93391200 | 2.44423500  | -0.69691900 |
| C  | -0.90853300 | 0.29219200  | 3.12592600  |
| C  | 3.41924500  | 0.83461300  | 1.02993700  |
| C  | 1.42437400  | 3.51232700  | -2.46139400 |
| C  | -4.03129900 | 0.06740900  | 3.50202300  |
| C  | 1.07150800  | -1.07819800 | 5.06797400  |
| C  | 5.80473400  | 1.66387300  | -0.77472900 |
| C  | -0.58169000 | 4.77778900  | -4.47497900 |
| O  | -3.52925700 | -0.58370700 | 4.40987100  |
| C  | -2.78061500 | 1.79581600  | 0.51013400  |
| C  | 0.45295500  | 0.27469800  | 2.90799900  |
| C  | 3.27021000  | 1.60212900  | -0.11198100 |
| C  | 0.05196200  | 3.46724600  | -2.28851000 |
| C  | -3.88306800 | 1.34977300  | 1.32677900  |
| C  | 1.42002800  | -0.36734800 | 3.79212000  |
| C  | 4.36438500  | 2.01904800  | -0.97342500 |
| C  | -0.92356400 | 4.01264900  | -3.23419600 |
| C  | -3.31263300 | 0.73703300  | 2.42481400  |
| C  | 2.63989400  | -0.23230500 | 3.18991500  |

|   |             |             |             |
|---|-------------|-------------|-------------|
| C | 3.80358600  | 2.81990700  | -1.94352200 |
| C | -2.15157800 | 3.65650800  | -2.75022100 |
| C | -1.86347400 | 0.82993100  | 2.24448700  |
| C | 2.40462600  | 0.49908500  | 1.94334000  |
| C | 2.37100200  | 2.85902400  | -1.65831700 |
| C | -1.90649600 | 2.92706900  | -1.51860300 |
| C | 3.98816500  | -0.70232400 | 3.69609800  |
| O | 4.76987800  | -1.29928900 | 2.67365700  |
| N | 2.06853400  | 2.11572800  | -0.55801600 |
| H | -5.56177500 | 2.59110900  | 0.80206500  |
| H | 3.96517400  | 4.47374900  | -3.33837900 |
| H | -4.12770100 | 4.50840300  | -2.58554600 |
| H | 6.06285400  | 2.23577900  | -3.50454100 |
| H | -3.94915700 | 2.62391600  | -1.03177300 |
| H | -1.30048100 | -0.18629800 | 4.01502100  |
| H | 4.40093400  | 0.44102700  | 1.26344700  |
| H | 1.79626400  | 4.04013400  | -3.33204500 |
| H | 1.94947500  | -1.21133500 | 5.70306600  |
| H | 6.45385000  | 2.43993300  | -1.18977500 |
| H | 0.00895400  | 4.17205000  | -5.17241600 |
| H | 3.80416600  | -1.43139700 | 4.50094000  |
| H | 4.20546300  | -1.95596700 | 2.20257200  |
| H | -5.55041400 | 1.01214500  | 0.01228800  |
| H | -3.48291300 | 4.48384200  | -4.22469500 |
| H | 5.95599700  | 3.78956600  | -4.49655300 |
| H | -5.13562600 | 0.17120200  | 3.45089300  |
| H | 0.32370600  | -0.52934900 | 5.64808400  |
| H | 6.04996100  | 1.54339800  | 0.28394900  |
| H | -1.48038900 | 5.10345300  | -5.00387300 |
| H | 0.66630000  | -2.07569900 | 4.85778500  |
| H | 6.06375100  | 0.72074400  | -1.27247900 |
| H | 0.00795400  | 5.67314100  | -4.24639000 |
| H | -4.06789600 | 2.99521000  | -3.49192300 |
| H | -6.00099800 | 1.14920100  | 1.71422600  |
| C | 4.82075000  | 0.44208400  | 4.28023700  |
| H | 5.79150000  | 0.05424600  | 4.60142500  |
| H | 4.99453800  | 1.22131500  | 3.53193200  |
| H | 4.31981500  | 0.89396800  | 5.14188500  |
| C | -1.19255400 | -4.94528000 | -2.93232000 |
| C | -0.12158900 | -4.34472300 | -2.09147500 |
| C | 1.13668200  | -4.83245900 | -1.90072900 |
| N | -0.22094200 | -3.12260600 | -1.42819400 |
| C | 0.94704300  | -2.89629900 | -0.85733600 |
| N | 1.81678200  | -3.91261900 | -1.11897100 |

|   |             |             |             |
|---|-------------|-------------|-------------|
| H | 1.22193900  | -2.02045100 | -0.29388300 |
| H | -0.84684100 | -5.88307200 | -3.37289200 |
| H | 1.60239400  | -5.74359100 | -2.23873300 |
| C | 6.00962200  | -4.56679400 | -3.48396700 |
| C | 5.32161200  | -4.16949000 | -2.21900100 |
| C | 6.00804400  | -3.69687000 | -1.07239500 |
| C | 3.93520600  | -4.23324100 | -2.17272200 |
| C | 5.32460000  | -3.28897400 | 0.05283700  |
| C | 3.22581900  | -3.84789500 | -1.04591400 |
| C | 3.88682300  | -3.32892500 | 0.12384300  |
| O | 3.23063400  | -2.91582600 | 1.14292500  |
| H | 6.67457200  | -5.42714900 | -3.33142100 |
| H | 7.09370500  | -3.64185900 | -1.08861000 |
| H | 3.39233100  | -4.55518700 | -3.05485200 |
| H | 5.85251400  | -2.90636100 | 0.92057000  |
| H | 5.29316000  | -4.83617500 | -4.26323800 |
| H | -2.10007800 | -5.15723900 | -2.35492700 |
| H | 0.74130000  | 0.35737400  | -1.64107700 |
| C | -0.56039600 | 7.09904200  | 2.18971200  |
| C | -0.00877500 | 5.72915100  | 1.94634800  |
| C | -0.49455000 | 4.65811700  | 1.24169800  |
| N | 1.21703700  | 5.29764300  | 2.43124200  |
| C | 1.42642800  | 4.02271000  | 2.01306700  |
| N | 0.40439100  | 3.60688700  | 1.28572800  |
| H | 2.30924800  | 3.44797500  | 2.24441100  |
| H | -1.53429200 | 7.19424300  | 1.70515100  |
| H | -1.42395600 | 4.57995900  | 0.70208300  |
| H | -0.69776500 | 7.30137900  | 3.25809200  |
| H | 1.85306900  | 5.83633900  | 3.00042800  |
| C | -5.41295900 | -3.50889200 | 3.00926200  |
| C | -4.24738200 | -3.35577100 | 2.09395700  |
| C | -4.06812500 | -2.63491400 | 0.94419200  |
| N | -3.02093800 | -3.95286600 | 2.32132300  |
| C | -2.15718500 | -3.58147900 | 1.34664200  |
| N | -2.76946900 | -2.78181800 | 0.48431100  |
| H | -1.10581900 | -3.84374200 | 1.35265100  |
| H | -5.65596800 | -4.56176900 | 3.19119600  |
| H | -4.78625400 | -2.02197100 | 0.42453800  |
| H | -5.21972500 | -3.03193700 | 3.97731600  |
| C | -7.27784700 | -1.79893900 | -2.26135800 |
| C | -5.82434500 | -1.52695100 | -2.42674600 |
| C | -4.72907100 | -2.29498200 | -2.13968400 |
| N | -5.29881900 | -0.30737600 | -2.83302500 |
| C | -3.94196600 | -0.37914400 | -2.75960900 |

|   |             |             |             |
|---|-------------|-------------|-------------|
| N | -3.56812700 | -1.57057900 | -2.32799500 |
| H | -3.27357800 | 0.43660200  | -2.98884700 |
| H | -7.83988700 | -1.66161500 | -3.19256800 |
| H | -4.70742700 | -3.31191800 | -1.77968800 |
| H | -7.42337000 | -2.83235200 | -1.93976200 |
| H | -5.83065600 | 0.48244400  | -3.16878500 |
| H | -2.77659800 | -4.52329600 | 3.11833500  |
| H | 1.61989100  | -3.39310800 | 1.91305000  |
| O | 0.72561800  | -3.35889700 | 2.30906200  |
| H | 0.59738400  | -2.41389700 | 2.46462600  |
| H | 6.64082100  | -3.75790700 | -3.87321200 |
| H | 0.09342400  | 7.87860200  | 1.78224500  |
| H | -1.47540400 | -4.26857100 | -3.74641300 |
| H | -6.29589200 | -3.03608600 | 2.57298100  |
| H | -7.72925900 | -1.14642700 | -1.50444200 |

**I<sub>p</sub>**

|    |             |             |             |
|----|-------------|-------------|-------------|
| Fe | 0.28513800  | 1.77855300  | 0.30672700  |
| Cu | -1.98533300 | -1.99400700 | -1.23548400 |
| O  | 0.36618100  | 0.33062800  | -0.81261900 |
| O  | -0.82083800 | 0.01035900  | -1.55565600 |
| C  | -5.27454600 | 1.66153500  | 0.96696200  |
| C  | 4.52704900  | 3.47267200  | -3.00897100 |
| C  | -3.42026100 | 3.99558400  | -3.27964200 |
| N  | -1.52702300 | 1.45400000  | 1.06595300  |
| C  | 5.62478500  | 3.07498900  | -3.66959700 |
| N  | 1.11636700  | 0.78709100  | 1.81083000  |
| N  | -0.52463600 | 2.84572100  | -1.22513600 |
| C  | -2.88162300 | 2.54779900  | -0.66971700 |
| C  | -0.90261500 | 0.23382700  | 3.08995700  |
| C  | 3.46239700  | 0.79907000  | 1.08120900  |
| C  | 1.51583100  | 3.48483900  | -2.41673900 |
| C  | -4.01672300 | 0.10219500  | 3.47956000  |
| C  | 1.04316000  | -1.20013300 | 5.01384500  |
| C  | 5.86313700  | 1.58538200  | -0.72948200 |
| C  | -0.44761200 | 4.74867100  | -4.46565800 |
| O  | -3.53205700 | -0.56314700 | 4.38618600  |
| C  | -2.73427900 | 1.84429900  | 0.51085800  |
| C  | 0.46644500  | 0.22488900  | 2.89299700  |
| C  | 3.33252000  | 1.59550800  | -0.05312800 |
| C  | 0.13265700  | 3.45153300  | -2.25829600 |
| C  | -3.83875700 | 1.41881700  | 1.32485800  |
| C  | 1.41520800  | -0.44522300 | 3.77129600  |
| C  | 4.43133100  | 1.97654700  | -0.92331200 |

|   |             |             |             |
|---|-------------|-------------|-------------|
| C | -0.81587600 | 4.01461700  | -3.21253800 |
| C | -3.28164200 | 0.75822000  | 2.40414800  |
| C | 2.64541900  | -0.30205400 | 3.19051900  |
| C | 3.88121800  | 2.77961700  | -1.89789600 |
| C | -2.06176300 | 3.71237700  | -2.72529000 |
| C | -1.83704300 | 0.79918400  | 2.21775700  |
| C | 2.44035500  | 0.46613300  | 1.96884500  |
| C | 2.45046400  | 2.85198400  | -1.60279100 |
| C | -1.84888700 | 2.99639500  | -1.48861000 |
| C | 3.98076700  | -0.81250300 | 3.69046200  |
| O | 4.74194600  | -1.42440600 | 2.66265800  |
| N | 2.15443300  | 2.14018200  | -0.47625200 |
| H | -5.47745600 | 2.73063100  | 0.83821200  |
| H | 4.06126900  | 4.40715400  | -3.32023000 |
| H | -4.04925700 | 4.53913500  | -2.56530100 |
| H | 6.12901300  | 2.13931400  | -3.45357700 |
| H | -3.89381300 | 2.77940200  | -0.98018400 |
| H | -1.30680200 | -0.25895300 | 3.96534000  |
| H | 4.43213400  | 0.37270200  | 1.30623100  |
| H | 1.89375500  | 3.99709900  | -3.29415600 |
| H | 1.90423000  | -1.33448300 | 5.67152400  |
| H | 6.53028800  | 2.34354100  | -1.14925400 |
| H | 0.11699900  | 4.11273200  | -5.15768400 |
| H | 3.77824600  | -1.53925900 | 4.49293200  |
| H | 4.15437100  | -2.05432800 | 2.18116500  |
| H | -5.53449500 | 1.16365900  | 0.02545300  |
| H | -3.36643000 | 4.60381300  | -4.18618000 |
| H | 6.03971900  | 3.67769200  | -4.47106700 |
| H | -5.11784900 | 0.23509800  | 3.42914500  |
| H | 0.26598400  | -0.68579800 | 5.58674500  |
| H | 6.11010500  | 1.46262500  | 0.32864600  |
| H | -1.33551100 | 5.10105000  | -4.99594600 |
| H | 0.66801800  | -2.19783900 | 4.75466400  |
| H | 6.09622700  | 0.63433700  | -1.22486400 |
| H | 0.17528900  | 5.62486500  | -4.25203200 |
| H | -3.95476500 | 3.07523500  | -3.54876300 |
| H | -5.95825000 | 1.29292700  | 1.73393400  |
| C | 4.84389300  | 0.30615100  | 4.27360400  |
| H | 5.80657600  | -0.10680300 | 4.58797700  |
| H | 5.03326000  | 1.08504800  | 3.52912100  |
| H | 4.36032200  | 0.76674500  | 5.14087100  |
| C | -1.33051600 | -4.93231200 | -2.91227000 |
| C | -0.22699800 | -4.31499800 | -2.13000400 |
| C | 1.02009600  | -4.81465300 | -1.90553600 |

|   |             |             |             |
|---|-------------|-------------|-------------|
| N | -0.30648200 | -3.05506800 | -1.54515400 |
| C | 0.86835300  | -2.81169200 | -0.98481800 |
| N | 1.71553700  | -3.85760400 | -1.18275900 |
| H | 1.15273400  | -1.89749400 | -0.48618800 |
| H | -1.01765500 | -5.89534600 | -3.32260500 |
| H | 1.47279300  | -5.75305100 | -2.18071800 |
| C | 5.87771400  | -4.74848700 | -3.48302200 |
| C | 5.21584100  | -4.27828200 | -2.23134500 |
| C | 5.91182500  | -3.84519100 | -1.07966700 |
| C | 3.82587700  | -4.26399600 | -2.20326600 |
| C | 5.23578300  | -3.40810600 | 0.04148400  |
| C | 3.12613200  | -3.84769100 | -1.08581600 |
| C | 3.79809300  | -3.37902300 | 0.09789000  |
| O | 3.15310400  | -2.95377000 | 1.11898100  |
| H | 6.01666200  | -5.83879300 | -3.47762500 |
| H | 6.99888200  | -3.84535500 | -1.08420900 |
| H | 3.27637900  | -4.55334700 | -3.09331900 |
| H | 5.77296100  | -3.05802000 | 0.91711800  |
| H | 5.28058000  | -4.50652000 | -4.36709800 |
| H | -2.22206700 | -5.10266000 | -2.29695900 |
| H | -0.41799500 | -0.29605100 | -2.38567300 |
| C | -0.36198500 | 7.10101900  | 2.18286800  |
| C | 0.13014200  | 5.70883700  | 1.93963400  |
| C | -0.39490600 | 4.65753400  | 1.23344000  |
| N | 1.33653100  | 5.22882500  | 2.43054700  |
| C | 1.49784700  | 3.94895800  | 2.01527200  |
| N | 0.46204300  | 3.57176300  | 1.28452700  |
| H | 2.35634700  | 3.34057500  | 2.25123800  |
| H | -1.33126700 | 7.23861200  | 1.69926000  |
| H | -1.32399500 | 4.61611100  | 0.68935500  |
| H | -0.48925400 | 7.30868700  | 3.25141100  |
| H | 1.99123700  | 5.74250500  | 3.00216200  |
| C | -5.49542900 | -3.37111000 | 3.03690600  |
| C | -4.32957300 | -3.25171500 | 2.12332200  |
| C | -4.13751800 | -2.52612200 | 0.97944500  |
| N | -3.11804300 | -3.88054300 | 2.34388100  |
| C | -2.25005400 | -3.51810800 | 1.36709100  |
| N | -2.84564700 | -2.69569000 | 0.51612000  |
| H | -1.20565500 | -3.80854600 | 1.36166800  |
| H | -5.77240600 | -4.41566600 | 3.21967100  |
| H | -4.84493200 | -1.89383500 | 0.46699500  |
| H | -5.28832100 | -2.90124300 | 4.00582200  |
| C | -7.32742600 | -1.62234700 | -2.23252600 |
| C | -5.87657500 | -1.33418000 | -2.38637700 |



|   |             |             |             |
|---|-------------|-------------|-------------|
| C | -4.77914700 | -2.11916700 | -2.16435200 |
| N | -5.35726300 | -0.08803800 | -2.70685100 |
| C | -3.99952400 | -0.16113100 | -2.64951400 |
| N | -3.61884600 | -1.37993000 | -2.30902400 |
| H | -3.34328800 | 0.67663200  | -2.82585600 |
| H | -7.89425400 | -1.42418400 | -3.14968400 |
| H | -4.75294100 | -3.15732000 | -1.87163200 |
| H | -7.46742400 | -2.67565100 | -1.98084200 |
| H | -5.89310400 | 0.72343300  | -2.97840200 |
| H | -2.88477400 | -4.46033600 | 3.13722900  |
| H | 1.53726200  | -3.39079800 | 1.84025200  |
| O | 0.64327500  | -3.35806900 | 2.23995400  |
| H | 0.48618800  | -2.40915900 | 2.32973900  |
| H | 6.87123200  | -4.30782300 | -3.61520600 |
| H | 0.32503600  | 7.85100300  | 1.77465000  |
| H | -1.62826800 | -4.28786000 | -3.74736800 |
| H | -6.36412100 | -2.87108500 | 2.60194500  |
| H | -7.77671800 | -1.02440600 | -1.43081900 |

**I<sub>R</sub>'**

|    |             |             |             |
|----|-------------|-------------|-------------|
| Fe | 0.01657000  | 1.83905400  | 0.19916900  |
| Cu | -1.61771900 | -2.21663600 | -1.21412400 |
| O  | -0.10785100 | 0.30615300  | -0.61436700 |
| O  | -0.58290500 | -0.73735200 | 0.00231000  |
| C  | -5.46026800 | 0.96682200  | 0.81696600  |
| C  | 4.05622100  | 3.54382900  | -3.31118600 |
| C  | -3.89618700 | 3.32354000  | -3.53267300 |
| N  | -1.77142700 | 1.52139300  | 1.07338200  |
| C  | 5.15928000  | 3.16004700  | -3.97030300 |
| N  | 0.92902900  | 1.11184600  | 1.81586200  |
| N  | -0.88614900 | 2.65917800  | -1.41961000 |
| C  | -3.20334100 | 2.14562000  | -0.82581400 |
| C  | -1.02524300 | 0.65109100  | 3.23396600  |
| C  | 3.24273900  | 1.14678600  | 0.99241800  |
| C  | 1.06453500  | 3.38575000  | -2.69404000 |
| C  | -4.07962300 | -0.00616500 | 3.55540500  |
| C  | 1.07861000  | -0.18944400 | 5.34224300  |
| C  | 5.54064100  | 1.93449700  | -0.91903300 |
| C  | -1.02652500 | 4.29128400  | -4.79928900 |
| O  | -3.52858900 | -0.47871400 | 4.54155400  |
| C  | -2.98588400 | 1.61266000  | 0.44195900  |
| C  | 0.33954400  | 0.71909100  | 2.99979200  |
| C  | 3.02410200  | 1.80656400  | -0.20872400 |
| C  | -0.30572500 | 3.24226800  | -2.50777800 |

|   |             |             |             |
|---|-------------|-------------|-------------|
| C | -4.03418500 | 1.07997400  | 1.26594400  |
| C | 1.35112300  | 0.24254400  | 3.93004600  |
| C | 4.08182500  | 2.20135100  | -1.12335000 |
| C | -1.31539000 | 3.62346200  | -3.48958200 |
| C | -3.42453300 | 0.66977500  | 2.44117900  |
| C | 2.55576200  | 0.31320600  | 3.26801100  |
| C | 3.46853400  | 2.88745500  | -2.14576400 |
| C | -2.51614000 | 3.22831700  | -2.96800200 |
| C | -2.00710200 | 0.95502900  | 2.29270400  |
| C | 2.27187100  | 0.87277600  | 1.95487100  |
| C | 2.03902800  | 2.87820000  | -1.84621500 |
| C | -2.23087600 | 2.64067300  | -1.67377000 |
| C | 3.93097600  | -0.03838000 | 3.79965100  |
| O | 4.75158100  | -0.69466700 | 2.84166700  |
| N | 1.79885400  | 2.22362900  | -0.66754100 |
| H | -5.86962500 | 1.94523600  | 0.54074100  |
| H | 3.53592400  | 4.43215900  | -3.66760900 |
| H | -4.56351000 | 3.90438200  | -2.88533500 |
| H | 5.71227300  | 2.26417000  | -3.70889100 |
| H | -4.22963200 | 2.19045200  | -1.16960200 |
| H | -1.37399100 | 0.25304600  | 4.17822800  |
| H | 4.24829200  | 0.82484400  | 1.22869900  |
| H | 1.39526100  | 3.85737800  | -3.61139500 |
| H | 1.92636400  | -0.73303200 | 5.76640100  |
| H | 6.14547800  | 2.68132800  | -1.44041300 |
| H | -0.37715900 | 3.67538100  | -5.43238000 |
| H | 3.79502700  | -0.68607900 | 4.68066900  |
| H | 4.29385700  | -1.48694800 | 2.50478100  |
| H | -5.54395600 | 0.31792000  | -0.06236400 |
| H | -3.89737000 | 3.80527100  | -4.51359300 |
| H | 5.52858100  | 3.73083300  | -4.81626300 |
| H | -5.18264000 | -0.08904800 | 3.45519700  |
| H | 0.88935400  | 0.67442600  | 5.99055200  |
| H | 5.81127200  | 1.95580700  | 0.14039700  |
| H | -1.94444100 | 4.48366800  | -5.35978000 |
| H | 0.19734300  | -0.83535500 | 5.41060000  |
| H | 5.83249700  | 0.94924500  | -1.30425600 |
| H | -0.52111700 | 5.25368700  | -4.65805700 |
| H | -4.35492600 | 2.33510800  | -3.66367800 |
| H | -6.10606100 | 0.55494200  | 1.59505000  |
| C | 4.70654600  | 1.20267700  | 4.24254300  |
| H | 5.69493300  | 0.90443800  | 4.60280100  |
| H | 4.83830200  | 1.89302700  | 3.40471700  |
| H | 4.18198300  | 1.72784000  | 5.04630700  |

|   |             |             |             |
|---|-------------|-------------|-------------|
| C | -0.58966200 | -5.19614000 | -2.70119200 |
| C | 0.41898500  | -4.40860600 | -1.95796900 |
| C | 1.67219700  | -4.77751700 | -1.56340900 |
| N | 0.21543600  | -3.07684600 | -1.63647700 |
| C | 1.34640400  | -2.64560100 | -1.10370700 |
| N | 2.25554000  | -3.64825600 | -1.00853400 |
| H | 1.55818400  | -1.63709700 | -0.79150100 |
| H | -0.22747500 | -6.20782500 | -2.90124500 |
| H | 2.21007500  | -5.70907800 | -1.63706800 |
| C | 6.52960000  | -4.03645600 | -3.24176400 |
| C | 5.80314500  | -3.69320600 | -1.97739500 |
| C | 6.42507500  | -3.32937400 | -0.77197300 |
| C | 4.42097900  | -3.75963900 | -1.98856800 |
| C | 5.67750100  | -3.05444000 | 0.37044400  |
| C | 3.66417500  | -3.50418500 | -0.84945700 |
| C | 4.27688100  | -3.14536700 | 0.35606700  |
| O | 3.60376000  | -2.89839400 | 1.51335600  |
| H | 7.43067500  | -3.42875300 | -3.37688900 |
| H | 7.50814000  | -3.25486900 | -0.72367300 |
| H | 3.89609900  | -4.01502400 | -2.90398200 |
| H | 6.16228300  | -2.76458300 | 1.29709300  |
| H | 6.85342400  | -5.08503600 | -3.24591700 |
| H | -1.53258600 | -5.28065600 | -2.14814000 |
| C | -1.36781500 | 7.09239900  | 1.78131900  |
| C | -0.62583200 | 5.81980800  | 1.55944000  |
| C | -1.02130400 | 4.62276800  | 1.02631900  |
| N | 0.71304500  | 5.64076900  | 1.87262200  |
| C | 1.07288900  | 4.37946300  | 1.52395500  |
| N | 0.03974300  | 3.74083800  | 1.00665800  |
| H | 2.06485500  | 3.97535800  | 1.65082300  |
| H | -2.40306600 | 6.97523600  | 1.45433200  |
| H | -1.99250700 | 4.34365100  | 0.65211300  |
| H | -1.38402700 | 7.38097900  | 2.83878200  |
| H | 1.32291600  | 6.32910200  | 2.28862500  |
| C | -5.00459600 | -3.93850000 | 3.13863000  |
| C | -3.85164600 | -3.69236500 | 2.22790000  |
| C | -3.74619100 | -3.03930300 | 1.02859600  |
| N | -2.57090300 | -4.14488400 | 2.48523700  |
| C | -1.76282000 | -3.77452100 | 1.46102800  |
| N | -2.44827000 | -3.10136500 | 0.55476300  |
| H | -0.70215200 | -3.97123200 | 1.44138100  |
| H | -5.13164600 | -5.00479200 | 3.35740600  |
| H | -4.52362600 | -2.53580500 | 0.47693100  |
| H | -4.88644100 | -3.40907100 | 4.09158600  |

|   |             |             |             |
|---|-------------|-------------|-------------|
| C | -6.99681400 | -2.72596500 | -2.22257600 |
| C | -5.59911600 | -2.22736200 | -2.37929400 |
| C | -4.39587900 | -2.81112300 | -2.08654200 |
| N | -5.26959900 | -0.94329700 | -2.79085000 |
| C | -3.91697000 | -0.80150600 | -2.71858400 |
| N | -3.35868000 | -1.91397500 | -2.27734900 |
| H | -3.39554500 | 0.11039600  | -2.96586900 |
| H | -7.56126800 | -2.68917400 | -3.16143000 |
| H | -4.21428700 | -3.80842200 | -1.71772500 |
| H | -6.97894800 | -3.76560300 | -1.88918100 |
| H | -5.91691800 | -0.24675100 | -3.13019600 |
| H | -2.28067100 | -4.65988000 | 3.30385100  |
| H | 5.89312600  | -3.88822200 | -4.11793700 |
| H | -0.93210600 | 7.92418700  | 1.21560200  |
| H | -0.81839100 | -4.72108100 | -3.66170000 |
| H | -5.92761400 | -3.58429600 | 2.67402600  |
| H | -7.55301900 | -2.14426200 | -1.47815900 |
| H | 0.47736400  | -1.74579200 | 1.33735400  |
| O | 1.00431900  | -2.33686000 | 1.90631400  |
| H | 2.62280600  | -2.82160200 | 1.41989200  |
| H | 1.15721800  | -1.80902800 | 2.70600200  |

**TS1'**

|    |             |             |             |
|----|-------------|-------------|-------------|
| Fe | 0.14716100  | 1.83123300  | 0.16395600  |
| Cu | -1.74437600 | -1.95939600 | -1.01815000 |
| O  | 0.28838200  | 0.07626300  | -0.18283800 |
| O  | -0.62765400 | -0.79674200 | 0.36345100  |
| C  | -5.37955900 | 1.40240300  | 0.60286700  |
| C  | 4.44768500  | 2.45347000  | -3.40102500 |
| C  | -3.43952700 | 3.45692900  | -3.74852500 |
| N  | -1.68262800 | 1.63631000  | 0.97640700  |
| C  | 5.47532800  | 1.78135100  | -3.93913400 |
| N  | 0.98597300  | 1.19236400  | 1.95950100  |
| N  | -0.60569800 | 2.50133200  | -1.49669200 |
| C  | -2.98952800 | 2.40345200  | -0.94350600 |
| C  | -1.08509100 | 0.63039700  | 3.13343100  |
| C  | 3.32028200  | 1.01423000  | 1.23455700  |
| C  | 1.44354100  | 2.81402600  | -2.82150000 |
| C  | -4.16047900 | 0.05586100  | 3.25043700  |
| C  | 0.80034300  | -0.44139600 | 5.34164800  |
| C  | 5.71207900  | 1.19565400  | -0.69128500 |
| C  | -0.44793800 | 3.79660800  | -5.02877300 |
| O  | -3.67243100 | -0.55006700 | 4.19743500  |
| C  | -2.86727800 | 1.85038800  | 0.32513000  |

|   |             |             |             |
|---|-------------|-------------|-------------|
| C | 0.29331300  | 0.71444100  | 3.04395900  |
| C | 3.19261200  | 1.49631900  | -0.05342300 |
| C | 0.07703000  | 2.89124700  | -2.63704400 |
| C | -3.97350600 | 1.35895900  | 1.09122400  |
| C | 1.20737800  | 0.12177200  | 4.01244300  |
| C | 4.30152300  | 1.59646800  | -0.98690900 |
| C | -0.85183100 | 3.33071800  | -3.66468500 |
| C | -3.43146400 | 0.81384300  | 2.24132800  |
| C | 2.45826200  | 0.20294900  | 3.45349000  |
| C | 3.78040100  | 2.12921900  | -2.14306400 |
| C | -2.10376200 | 3.20092700  | -3.13310200 |
| C | -1.99617700 | 1.02651400  | 2.15329100  |
| C | 2.28905800  | 0.85978100  | 2.16585200  |
| C | 2.35825500  | 2.33452100  | -1.88482000 |
| C | -1.93717800 | 2.69559800  | -1.78736400 |
| C | 3.77929600  | -0.25453100 | 4.02472900  |
| O | 4.56893000  | -0.97946100 | 3.09636700  |
| N | 2.02276300  | 1.94209500  | -0.62897100 |
| H | -5.67549400 | 2.42289500  | 0.33477300  |
| H | 4.06191800  | 3.31917900  | -3.93898200 |
| H | -4.03043000 | 4.16403500  | -3.15493000 |
| H | 5.88061100  | 0.88461300  | -3.48202700 |
| H | -3.99107100 | 2.57525600  | -1.31869900 |
| H | -1.51481400 | 0.16451900  | 4.01132600  |
| H | 4.28847400  | 0.64194100  | 1.53875100  |
| H | 1.82763200  | 3.10666500  | -3.79135400 |
| H | 1.61109700  | -1.01622500 | 5.79452600  |
| H | 6.40884200  | 1.72532300  | -1.34594400 |
| H | 0.07559400  | 3.00751400  | -5.58109400 |
| H | 3.56625700  | -0.88332800 | 4.90506200  |
| H | 3.98589600  | -1.45246700 | 2.45533600  |
| H | -5.50110400 | 0.78118300  | -0.29306600 |
| H | -3.34743800 | 3.87132400  | -4.75486900 |
| H | 5.92679400  | 2.10300300  | -4.87208800 |
| H | -5.25941500 | 0.02771000  | 3.09348700  |
| H | 0.52949300  | 0.35626000  | 6.04316100  |
| H | 5.98422800  | 1.41197700  | 0.34595400  |
| H | -1.31407400 | 4.09657000  | -5.62255200 |
| H | -0.07186500 | -1.09864900 | 5.25685000  |
| H | 5.85700200  | 0.11886800  | -0.84276000 |
| H | 0.22909000  | 4.65654100  | -4.97247000 |
| H | -4.03123500 | 2.53604100  | -3.83453800 |
| H | -6.09121400 | 1.04602100  | 1.35039200  |
| C | 4.61482700  | 0.94032300  | 4.48263900  |

|   |             |             |             |
|---|-------------|-------------|-------------|
| H | 5.58250800  | 0.58707600  | 4.84964000  |
| H | 4.79320900  | 1.62527400  | 3.64880600  |
| H | 4.11228500  | 1.49058600  | 5.28452500  |
| C | -0.89014100 | -5.26572800 | -2.47348900 |
| C | 0.09640500  | -4.33110500 | -1.87418900 |
| C | 1.36113500  | -4.63949100 | -1.46686900 |
| N | -0.08734900 | -2.95435900 | -1.76022500 |
| C | 1.07141200  | -2.45975900 | -1.33913900 |
| N | 1.96769900  | -3.44384800 | -1.12342700 |
| H | 1.28844000  | -1.41988000 | -1.15507400 |
| H | -0.52715100 | -6.29476300 | -2.41923400 |
| H | 1.88885700  | -5.57745600 | -1.40868800 |
| C | 6.31738300  | -4.71053600 | -2.72535000 |
| C | 5.55067300  | -3.91599200 | -1.72102100 |
| C | 6.10956300  | -3.18978400 | -0.65584100 |
| C | 4.17084000  | -3.93518600 | -1.83355600 |
| C | 5.30509500  | -2.52904700 | 0.26748300  |
| C | 3.36039100  | -3.30058500 | -0.90961100 |
| C | 3.88724600  | -2.57279400 | 0.18659000  |
| O | 3.12667700  | -1.97053000 | 1.07499700  |
| H | 7.37119500  | -4.41616800 | -2.77151100 |
| H | 7.19031200  | -3.14884000 | -0.54473400 |
| H | 3.70564700  | -4.45707600 | -2.66471600 |
| H | 5.74482000  | -1.98176800 | 1.09530000  |
| H | 6.29746200  | -5.78147200 | -2.48495900 |
| H | -1.86007600 | -5.21877300 | -1.96284000 |
| C | -0.83824900 | 7.20692200  | 1.54357200  |
| C | -0.20914300 | 5.85859300  | 1.35292500  |
| C | -0.68824000 | 4.68032800  | 0.83805400  |
| N | 1.10718000  | 5.57684000  | 1.69805600  |
| C | 1.37673800  | 4.28350700  | 1.38825900  |
| N | 0.30562600  | 3.71727000  | 0.86304200  |
| H | 2.32443400  | 3.79478900  | 1.54965000  |
| H | -1.87534500 | 7.17851700  | 1.20317600  |
| H | -1.66750800 | 4.45864400  | 0.44686900  |
| H | -0.83758900 | 7.50823000  | 2.59703500  |
| H | 1.75993500  | 6.22470500  | 2.11401600  |
| C | -5.43284800 | -3.43191000 | 3.11021400  |
| C | -4.22172800 | -3.29729600 | 2.25733100  |
| C | -4.00021200 | -2.62952100 | 1.08283000  |
| N | -2.99881100 | -3.86030400 | 2.57705800  |
| C | -2.10120900 | -3.52673000 | 1.61199300  |
| N | -2.68485200 | -2.78493900 | 0.68570000  |
| H | -1.05571300 | -3.79702500 | 1.62949500  |

|   |             |             |             |
|---|-------------|-------------|-------------|
| H | -5.64588000 | -4.47701600 | 3.35980900  |
| H | -4.69819600 | -2.04923300 | 0.50157500  |
| H | -5.31262300 | -2.87014000 | 4.04443300  |
| C | -7.08495200 | -2.26602100 | -2.37548600 |
| C | -5.66812500 | -1.80262600 | -2.40367900 |
| C | -4.50746900 | -2.42725200 | -2.03442500 |
| N | -5.27337800 | -0.52228900 | -2.77097800 |
| C | -3.92458400 | -0.42217100 | -2.60424800 |
| N | -3.43618000 | -1.55835000 | -2.14252400 |
| H | -3.35455700 | 0.47177800  | -2.80207000 |
| H | -7.56009400 | -2.20854500 | -3.36143800 |
| H | -4.37502600 | -3.42979100 | -1.65931500 |
| H | -7.12181300 | -3.30735400 | -2.04894900 |
| H | -5.87666900 | 0.19685600  | -3.14256600 |
| H | -2.79945000 | -4.40226400 | 3.40510300  |
| H | 5.89865400  | -4.59886200 | -3.73087700 |
| H | -0.31554500 | 7.98027700  | 0.96973500  |
| H | -1.06751400 | -5.01991300 | -3.52669300 |
| H | -6.30251500 | -3.02940800 | 2.58555400  |
| H | -7.68925100 | -1.67293500 | -1.67902800 |
| H | 0.04094900  | -1.51856100 | 0.96748100  |
| O | 0.78503400  | -2.24836500 | 1.67913300  |
| H | 1.81217000  | -2.20237400 | 1.31993900  |
| H | 0.82642600  | -1.82664900 | 2.55150300  |

**I<sub>P</sub>'**

|    |             |             |             |
|----|-------------|-------------|-------------|
| Fe | 0.14434300  | 1.85040500  | 0.08220600  |
| Cu | -1.77737800 | -2.16472100 | -1.04818700 |
| O  | 0.24729500  | 0.06681600  | -0.24194400 |
| O  | -0.75137818 | -0.86923006 | 0.29199373  |
| C  | -5.38321300 | 1.37152200  | 0.63717500  |
| C  | 4.40670100  | 2.63521400  | -3.48693000 |
| C  | -3.52572900 | 3.32264900  | -3.79709400 |
| N  | -1.67744900 | 1.71908100  | 0.94315500  |
| C  | 5.47107800  | 2.05202500  | -4.05718500 |
| N  | 1.00538100  | 1.27536700  | 1.87631600  |
| N  | -0.63773100 | 2.47363800  | -1.58148400 |
| C  | -3.01307500 | 2.26532400  | -1.02454500 |
| C  | -1.03361200 | 0.99053300  | 3.19581500  |
| C  | 3.30908200  | 0.98183900  | 1.09260300  |
| C  | 1.39251300  | 2.87546600  | -2.90414400 |
| C  | -4.12743200 | 0.58408300  | 3.50123800  |
| C  | 0.91095300  | 0.03109400  | 5.42645900  |
| C  | 5.70520600  | 1.27467600  | -0.83832800 |

|   |             |             |             |
|---|-------------|-------------|-------------|
| C | -0.55422000 | 3.82736300  | -5.10036700 |
| O | -3.62623000 | 0.18313000  | 4.54397400  |
| C | -2.87265000 | 1.82787800  | 0.28482500  |
| C | 0.34164700  | 0.96032600  | 3.03623500  |
| C | 3.17597400  | 1.48354000  | -0.18856500 |
| C | 0.02441300  | 2.90331900  | -2.72229600 |
| C | -3.96991200 | 1.43995700  | 1.12321200  |
| C | 1.26978200  | 0.41101700  | 4.01970200  |
| C | 4.28167700  | 1.64137300  | -1.12034500 |
| C | -0.92709500 | 3.31086200  | -3.74464700 |
| C | -3.40945500 | 1.10477300  | 2.34323000  |
| C | 2.49060400  | 0.34401000  | 3.39410500  |
| C | 3.74960100  | 2.21969200  | -2.24993400 |
| C | -2.16920400 | 3.10445500  | -3.21292800 |
| C | -1.97098700 | 1.28948400  | 2.19793600  |
| C | 2.29415500  | 0.89165300  | 2.05903300  |
| C | 2.32316400  | 2.38500800  | -1.98154400 |
| C | -1.97262300 | 2.59438800  | -1.87360800 |
| C | 3.81342500  | -0.11955800 | 3.96369900  |
| O | 4.59216400  | -0.88151300 | 3.06094800  |
| N | 1.99818400  | 1.93827300  | -0.74497100 |
| H | -5.71917200 | 2.33894300  | 0.24645200  |
| H | 3.97960800  | 3.50645100  | -3.98305200 |
| H | -4.10757000 | 4.04518200  | -3.21276500 |
| H | 5.93019300  | 1.15636200  | -3.65249300 |
| H | -4.02047900 | 2.37076000  | -1.40850700 |
| H | -1.45027300 | 0.67388600  | 4.14435100  |
| H | 4.27494700  | 0.59734000  | 1.39339200  |
| H | 1.76912400  | 3.20318800  | -3.86598100 |
| H | 1.67278500  | -0.61399100 | 5.87091300  |
| H | 6.38515200  | 1.86104600  | -1.46193400 |
| H | 0.02229900  | 3.08838400  | -5.66911800 |
| H | 3.59822500  | -0.71101000 | 4.86973100  |
| H | 4.01612800  | -1.46356200 | 2.50587900  |
| H | -5.48274000 | 0.63984000  | -0.17292500 |
| H | -3.46922600 | 3.70277400  | -4.81997800 |
| H | 5.90169600  | 2.45105800  | -4.96991800 |
| H | -5.23097000 | 0.55514900  | 3.37980700  |
| H | 0.82139000  | 0.91720500  | 6.06654700  |
| H | 5.96726000  | 1.44896400  | 0.20918500  |
| H | -1.44016500 | 4.07571300  | -5.68920400 |
| H | -0.04736200 | -0.49540000 | 5.47893200  |
| H | 5.89705600  | 0.21417800  | -1.04307900 |
| H | 0.05906400  | 4.73326600  | -5.03175900 |



|   |             |             |             |
|---|-------------|-------------|-------------|
| H | -4.11080500 | 2.39489100  | -3.83263300 |
| H | -6.07946300 | 1.08519000  | 1.42822400  |
| C | 4.67405400  | 1.07366700  | 4.36773000  |
| H | 5.63729100  | 0.71621800  | 4.74313100  |
| H | 4.86305900  | 1.72236300  | 3.50744700  |
| H | 4.19280100  | 1.66792900  | 5.15116700  |
| C | -0.89907000 | -5.34749700 | -2.33433000 |
| C | 0.12465500  | -4.46230000 | -1.73574700 |
| C | 1.38155500  | -4.80352400 | -1.33405700 |
| N | -0.04260000 | -3.09308300 | -1.57642100 |
| C | 1.10972400  | -2.62644000 | -1.11795600 |
| N | 1.99551700  | -3.63021400 | -0.93351000 |
| H | 1.33766700  | -1.59205800 | -0.91341000 |
| H | -0.53397000 | -6.37593200 | -2.39221000 |
| H | 1.89439700  | -5.75095900 | -1.29984800 |
| C | 6.29978500  | -4.75460300 | -2.71568500 |
| C | 5.56287900  | -4.05776900 | -1.62647800 |
| C | 6.14847000  | -3.38661100 | -0.53546100 |
| C | 4.17938900  | -4.09403100 | -1.70254500 |
| C | 5.36738700  | -2.77558300 | 0.43486500  |
| C | 3.38922900  | -3.50481600 | -0.73909800 |
| C | 3.93837300  | -2.80421300 | 0.37678400  |
| O | 3.18825900  | -2.23008100 | 1.26495300  |
| H | 7.33975400  | -4.42140800 | -2.79690800 |
| H | 7.23174000  | -3.34406800 | -0.45297000 |
| H | 3.70119000  | -4.57943600 | -2.54790000 |
| H | 5.82471200  | -2.25762800 | 1.27204700  |
| H | 6.32983000  | -5.84024700 | -2.55036100 |
| H | -1.82995200 | -5.35507100 | -1.75418900 |
| C | -0.86601600 | 7.22681000  | 1.35256900  |
| C | -0.20363600 | 5.90088200  | 1.18491400  |
| C | -0.67113800 | 4.70817500  | 0.70216900  |
| N | 1.12047900  | 5.65102600  | 1.51409100  |
| C | 1.40340500  | 4.35634400  | 1.22542500  |
| N | 0.33404300  | 3.76058000  | 0.72901200  |
| H | 2.36497100  | 3.89547800  | 1.38581900  |
| H | -1.90549500 | 7.16177300  | 1.02469400  |
| H | -1.65694700 | 4.47354300  | 0.33577800  |
| H | -0.86668200 | 7.55509900  | 2.39832700  |
| H | 1.77046900  | 6.31644100  | 1.90630200  |
| C | -5.36501500 | -3.39525100 | 3.27111900  |
| C | -4.17537000 | -3.30020500 | 2.38713200  |
| C | -4.00065200 | -2.74019400 | 1.15125500  |
| N | -2.93693300 | -3.82250500 | 2.71060700  |

|   |             |             |             |
|---|-------------|-------------|-------------|
| C | -2.08220000 | -3.57824800 | 1.68456700  |
| N | -2.70119800 | -2.92172900 | 0.71802300  |
| H | -1.03260100 | -3.82984500 | 1.70663200  |
| H | -5.59859700 | -4.43303000 | 3.53581100  |
| H | -4.73113000 | -2.22392900 | 0.54942100  |
| H | -5.22556200 | -2.83515200 | 4.20360600  |
| C | -7.11119200 | -2.38456300 | -2.21627000 |
| C | -5.68500800 | -1.99439900 | -2.38430500 |
| C | -4.53609100 | -2.62561300 | -1.99471300 |
| N | -5.25695500 | -0.78409900 | -2.91087600 |
| C | -3.89985000 | -0.72766700 | -2.80580200 |
| N | -3.43561400 | -1.82444400 | -2.23601000 |
| H | -3.30700500 | 0.11248000  | -3.13344200 |
| H | -7.65622100 | -2.40455200 | -3.16725300 |
| H | -4.43542500 | -3.59217000 | -1.52663900 |
| H | -7.16780200 | -3.38588000 | -1.78437500 |
| H | -5.84500300 | -0.08703600 | -3.34414200 |
| H | -2.70287300 | -4.30405900 | 3.56668900  |
| H | 5.82262700  | -4.59349700 | -3.68748800 |
| H | -0.37641100 | 8.00652300  | 0.75782000  |
| H | -1.15392200 | -5.02136800 | -3.34922400 |
| H | -6.23889300 | -2.98040000 | 2.76360600  |
| H | -7.64343800 | -1.69972300 | -1.54546100 |
| H | -0.15715155 | -1.38874949 | 0.92274953  |
| O | 0.69093900  | -2.24512800 | 1.90323000  |
| H | 1.64108600  | -2.33832800 | 1.57364300  |
| H | 0.77737500  | -1.73131100 | 2.71966400  |

## 7. The NPA charge of $I_R$ and $I_R'$

$I_R$

|    |          |
|----|----------|
| Fe | 0.34339  |
| Cu | 0.65884  |
| O  | -0.03857 |
| O  | -0.23584 |
| C  | -0.71429 |
| C  | -0.24941 |
| C  | -0.70258 |
| N  | -0.42872 |
| C  | -0.40080 |
| N  | -0.46282 |
| N  | -0.42714 |
| C  | -0.25388 |
| C  | -0.23984 |
| C  | -0.25644 |
| C  | -0.25130 |
| C  | 0.38229  |
| C  | -0.70965 |
| C  | -0.71401 |
| C  | -0.71105 |
| O  | -0.55530 |
| C  | 0.17573  |
| C  | 0.16305  |
| C  | 0.17891  |
| C  | 0.20346  |
| C  | 0.01390  |
| C  | -0.06123 |
| C  | -0.00654 |
| C  | -0.02667 |
| C  | -0.17635 |
| C  | -0.08313 |
| C  | -0.07908 |
| C  | -0.04841 |
| C  | 0.20130  |
| C  | 0.17813  |
| C  | 0.21486  |
| C  | 0.18485  |
| C  | 0.08432  |
| O  | -0.78639 |
| N  | -0.43629 |
| H  | 0.25464  |
| H  | 0.23484  |
| H  | 0.25171  |

|   |          |
|---|----------|
| H | 0.21903  |
| H | 0.23989  |
| H | 0.27279  |
| H | 0.27133  |
| H | 0.24804  |
| H | 0.24860  |
| H | 0.25722  |
| H | 0.25361  |
| H | 0.21807  |
| H | 0.50200  |
| H | 0.24780  |
| H | 0.25340  |
| H | 0.22886  |
| H | 0.14742  |
| H | 0.25928  |
| H | 0.24836  |
| H | 0.24784  |
| H | 0.25117  |
| H | 0.25619  |
| H | 0.25332  |
| H | 0.22688  |
| H | 0.25056  |
| C | -0.68911 |
| H | 0.25078  |
| H | 0.23027  |
| H | 0.23599  |
| C | -0.71138 |
| C | 0.13591  |
| C | -0.08473 |
| N | -0.58597 |
| C | 0.23469  |
| N | -0.37919 |
| H | 0.24555  |
| H | 0.25194  |
| H | 0.25582  |
| C | -0.69834 |
| C | -0.04620 |
| C | -0.21152 |
| C | -0.22232 |
| C | -0.27058 |
| C | 0.06314  |
| C | 0.32771  |
| O | -0.74194 |
| H | 0.24680  |

|   |          |
|---|----------|
| H | 0.24755  |
| H | 0.24698  |
| H | 0.26167  |
| H | 0.25189  |
| H | 0.24673  |
| H | 0.52655  |
| C | -0.72436 |
| C | 0.12500  |
| C | -0.05642 |
| N | -0.55355 |
| C | 0.24009  |
| N | -0.42613 |
| H | 0.24832  |
| H | 0.26423  |
| H | 0.25091  |
| H | 0.25527  |
| H | 0.45134  |
| C | -0.72650 |
| C | 0.12497  |
| C | -0.08193 |
| N | -0.55588 |
| C | 0.22544  |
| N | -0.57858 |
| H | 0.25152  |
| H | 0.25355  |
| H | 0.23934  |
| H | 0.26367  |
| C | -0.72500 |
| C | 0.11710  |
| C | -0.08245 |
| N | -0.56485 |
| C | 0.21905  |
| N | -0.57351 |
| H | 0.24545  |
| H | 0.25685  |
| H | 0.24776  |
| H | 0.26496  |
| H | 0.44829  |
| H | 0.45054  |
| H | 0.51656  |
| O | -0.97881 |
| H | 0.51054  |
| H | 0.25480  |
| H | 0.24394  |

|   |         |
|---|---------|
| H | 0.25933 |
| H | 0.25149 |
| H | 0.25882 |

**I<sub>R</sub>'**

|    |          |
|----|----------|
| Fe | 0.35803  |
| Cu | 0.65739  |
| O  | 0.02993  |
| O  | -0.28388 |
| C  | -0.71446 |
| C  | -0.25016 |
| C  | -0.70331 |
| N  | -0.42476 |
| C  | -0.39941 |
| N  | -0.43840 |
| N  | -0.44156 |
| C  | -0.26923 |
| C  | -0.23986 |
| C  | -0.26353 |
| C  | -0.25161 |
| C  | 0.38368  |
| C  | -0.71067 |
| C  | -0.71392 |
| C  | -0.71070 |
| O  | -0.55677 |
| C  | 0.16400  |
| C  | 0.17582  |
| C  | 0.18237  |
| C  | 0.20662  |
| C  | 0.02175  |
| C  | -0.06339 |
| C  | -0.00720 |
| C  | -0.02904 |
| C  | -0.18019 |
| C  | -0.07532 |
| C  | -0.07732 |
| C  | -0.04759 |
| C  | 0.21723  |
| C  | 0.18239  |
| C  | 0.21583  |
| C  | 0.17746  |
| C  | 0.08312  |
| O  | -0.78690 |
| N  | -0.44469 |

|   |          |
|---|----------|
| H | 0.25472  |
| H | 0.23492  |
| H | 0.25081  |
| H | 0.21924  |
| H | 0.24008  |
| H | 0.27286  |
| H | 0.27354  |
| H | 0.24855  |
| H | 0.24925  |
| H | 0.25710  |
| H | 0.25382  |
| H | 0.21869  |
| H | 0.50299  |
| H | 0.24727  |
| H | 0.25469  |
| H | 0.22917  |
| H | 0.14788  |
| H | 0.26052  |
| H | 0.24922  |
| H | 0.24811  |
| H | 0.25184  |
| H | 0.25644  |
| H | 0.25286  |
| H | 0.22696  |
| H | 0.25128  |
| C | -0.68875 |
| H | 0.25094  |
| H | 0.23103  |
| H | 0.23603  |
| C | -0.71134 |
| C | 0.13387  |
| C | -0.08404 |
| N | -0.59095 |
| C | 0.23834  |
| N | -0.38208 |
| H | 0.24609  |
| H | 0.25246  |
| H | 0.25586  |
| C | -0.69781 |
| C | -0.04684 |
| C | -0.21086 |
| C | -0.22134 |
| C | -0.27072 |
| C | 0.06223  |

|   |          |
|---|----------|
| C | 0.32788  |
| O | -0.74120 |
| H | 0.24702  |
| H | 0.24772  |
| H | 0.24716  |
| H | 0.26075  |
| H | 0.25203  |
| H | 0.24592  |
| C | -0.72423 |
| C | 0.12431  |
| C | -0.05675 |
| N | -0.55426 |
| C | 0.23346  |
| N | -0.43506 |
| H | 0.24723  |
| H | 0.26387  |
| H | 0.25024  |
| H | 0.25479  |
| H | 0.45112  |
| C | -0.72648 |
| C | 0.12428  |
| C | -0.08452 |
| N | -0.55478 |
| C | 0.21697  |
| N | -0.58170 |
| H | 0.25014  |
| H | 0.25301  |
| H | 0.23536  |
| H | 0.26346  |
| C | -0.72509 |
| C | 0.11956  |
| C | -0.08194 |
| N | -0.56561 |
| C | 0.22037  |
| N | -0.58031 |
| H | 0.24424  |
| H | 0.25727  |
| H | 0.25092  |
| H | 0.26622  |
| H | 0.44915  |
| H | 0.44901  |
| H | 0.24299  |
| H | 0.25460  |
| H | 0.25829  |



|   |          |
|---|----------|
| H | 0.25735  |
| H | 0.25257  |
| H | 0.51607  |
| O | -0.98641 |
| H | 0.52911  |
| H | 0.50721  |
